# Structure-guided optimization of light-activated chimeric G-protein coupled receptors

Alexandra-Madelaine Tichy<sup>a,b</sup>, Wang Lok So<sup>a,b</sup>, Elliot J. Gerrard<sup>a,b,c</sup> and Harald Janovjak<sup>a,b,\*</sup>

<sup>a</sup> Australian Regenerative Medicine Institute (ARMI), Faculty of Medicine, Nursing and Health Sciences, Monash University, 3800 Clayton/Melbourne, Australia.

<sup>b</sup> European Molecular Biology Laboratory Australia (EMBL Australia), Monash University, 3800 Clayton/Melbourne, Australia.

<sup>c</sup> Commonwealth Scientific and Industrial Research Organisation, Synthetic Biology Future Science Platform, Monash University, 3800 Clayton/Melbourne, Australia.

## Keywords:

Optogenetics, protein engineering, G-protein coupled receptor, cell signaling

\* To whom correspondence should be addressed.

Email: [harald.janovjak@monash.edu](mailto:harald.janovjak@monash.edu)

+61 3 99029612

## ABSTRACT

G-protein coupled receptors (GPCRs) are the largest human receptor family and involved in virtually every physiological process. One hallmark of GPCR function is the specific coupling of activated receptors to selected downstream signaling pathways. The ability to tune this coupling would permit the development of receptors with new capabilities. GPCRs and G-proteins have been recently resolved structurally at high resolution, but this information was in only very few cases harnessed for a rational engineering of these protein complexes. Here, we demonstrate the structure-guided optimization of coupling in chimeric light-activated GPCRs (OptoXRs). Our hypothesis was that the incorporation of structural GPCR-G $\alpha$  contacts will lead to improved receptor activity. We first evaluated structure-based alignments as complements to existing sequence-based methods for generation of chimeric receptors. We then show in a prototypical light-activated  $\beta_2$ AR that inclusion of  $\alpha$ -helical residues forming structural contacts to G $\alpha$  resulted in receptors with 7- to 20-fold increased function compared to other design strategies. In turn, elimination of GPCR-G $\alpha$  contacts diminished function. Finally, the efficient receptor design served as a platform for the optimization of a further light-activated receptor and spectral tuning of the photoreceptor core domain. Our work exemplifies how increased OptoXR potency and new functionalities can be achieved through structure-based design towards targeted inputs into cells and cellular networks.

## INTRODUCTION

G-protein coupled receptors (GPCRs) comprise the largest family of membrane receptors in the human genome. They are expressed broadly and regulate key biological processes, ranging from organism development to metabolism and brain function<sup>1,2</sup>. In line with their abundance and physiological importance, GPCRs are also exceptional therapeutic targets with ~30% of all prescription drugs acting on members of this receptor superfamily<sup>3,4</sup>.

Canonical signaling downstream of GPCRs is mediated through coupling to heterotrimeric G-proteins, which are often classified into four main groups according to their Gα subunits (the Gα<sub>s</sub>, Gα<sub>i/o</sub>, Gα<sub>q</sub> and Gα<sub>12/13</sub> groups). Gα subunits principally act on adenylyl cyclase to increase (Gα<sub>s</sub>) or decrease (Gα<sub>i/o</sub>) cAMP levels, on phospholipase C (PLC) to alter Ca<sup>2+</sup> signaling (Gα<sub>q</sub>) or on Rho GTPases (Gα<sub>12/13</sub>) to modulate motor proteins and the cytoskeleton (**Fig. 1a**). In addition, associated Gβ and Gγ subunits activate ion channels and a wide range of enzymes upon dissociation of the trimeric complex. In humans, at least 16 Gα subunits, 6 Gβ subunits and 13 Gγ subunits have been identified, which can assemble in a multitude of combinations leading to functionally-distinct outcomes<sup>5-7</sup>. GPCRs can also signal *via* β-arrestin scaffolding proteins ultimately to diverse signaling pathways (**Fig. 1a**). Importantly, the expression of multiple GPCRs and G-proteins in many cell types results in combinatorial complexity and dictates that specific GPCR-G-protein interactions guide signaling outcomes<sup>5,8</sup>.

Consequences of GPCR signaling are most commonly studied using pharmacological (e.g., agonists, antagonists or allosteric modulators) or genetic methods (e.g., receptor overexpression or knock-out) in cells and animals. As a complement, approaches have been developed to (in)activate GPCR signaling on shorter time scales and finer spatial scales than those dictated by drug diffusion or pharmacokinetics and those associated with genetic alterations<sup>9,10</sup>. One such approach are light-activated GPCRs, which are either repurposed from naturally light-sensing mammalian tissues<sup>11-13</sup> or from invertebrates and fish<sup>14-17</sup>, or are engineered as chimeric GPCRs (termed OptoXRs)<sup>18,19</sup>. Albeit of different sources, these light-activated GPCRs all permit spatio-temporal activation of signaling pathways by light in the emerging field of optogenetics<sup>20,21</sup>.

The purpose-built OptoXRs take advantage of conserved structure-function relationships by substituting the downstream coupling domains of a light-gated GPCR, such as the mammalian dim light sensor rhodopsin (rho), with those of a naturally ligand-gated target GPCR (**Fig. 1b**)<sup>18,19</sup>. The desired engineering outcome is that the chimeric GPCR can be activated by light but retains the signaling properties of the target receptor. OptoXRs have been expressed in neuronal and non-neuronal cell types *ex vivo* and *in vivo* using viral delivery or in transgenic animals and activated with light from a variety of sources<sup>22-24</sup>. Light control was often achieved *in vivo* without supplementation of the *cis*-isoform retinal cofactor<sup>18,25,26</sup>,

but supplementation protocols have also been developed<sup>22</sup>. The OptoXR methodology has been applied to a number of target GPCRs by us and others (see **Supplementary Table S1** for a -to our best knowledge- comprehensive list of OptoXRs). Notably, the design principle underlying most published receptors (see column “Domain Boundaries” in **Supplementary Table S1**) was derived from a pioneering study<sup>19</sup> that employed a trial-and-error screening strategy (i.e., various receptor residues and receptor domains were swapped and the emerging receptors tested functionally). This original and more recent trial-and-error designs have put forward the notion that intracellular loops (ICLs) are dominant determinants of function in OptoXRs<sup>19,27</sup>, but this has never been tested systematically<sup>9</sup>. The increasing application of chimeric and natural light-activated GPCRs not only as basic research tools but even potential future treatment strategies<sup>23,28,29</sup> calls for attempts to rationally engineer OptoXRs to, e.g., improve or diversify their function.

In the past decade, the structural information available for GPCRs has increased dramatically to encompass more than 600 high-resolution structures for more than 150 unique receptors<sup>1,30</sup>. Detailed analyses of these structures have provided insights into GPCR structure-function relationships, such as the universal heptahelical transmembrane (TM) domain, the translation and rotation of specific TM  $\alpha$ -helices upon receptor activation or the switch-like behavior of conserved residue networks<sup>31-35</sup>. Following from early successes using X-ray crystallography<sup>36</sup>, it was the advent of cryo-electron microscopy (cryo-EM) that revealed a number of active state and G-protein bound structures for members of several major GPCR classes<sup>37-39</sup>. Albeit structures of GPCR-G $\alpha$  complexes allow identifying key molecular interactions between GPCRs and their downstream transducers<sup>5,36,40</sup>, this knowledge has been in only very few cases harnessed for the development of receptors with rationally-designed downstream functions<sup>9,41</sup>. Specifically, orthogonal G $\alpha$  subunits<sup>42</sup> or GPCRs with promiscuous downstream coupling<sup>43</sup> were designed using modelling, molecular dynamics simulations and *in silico*/experimental mutagenesis. It remains to be further explored to what extent GPCR function can be redesigned using strategies that build on the identification of GPCR-G-protein contacts. Such strategies may complement seminal work in which downstream coupling in wildtype (WT) and chimeric GPCRs was altered through residue substitutions that were derived from functional screens or biochemical assays<sup>26,44,45</sup>.

Here, we optimized OptoXR function by harnessing high-resolution GPCR-G $\alpha$  structures. Besides potential future applications in optogenetics, we chose OptoXRs as a model system because an efficient switch in coupling, e.g. from the native G $\alpha_{i/o}$  preference of rho to a different G $\alpha$  group of the target receptor, is required for the faithful function of these chimeric receptors. We first explored if atomic structure superpositions are a required complement to sequence alignments for determination of functional domain boundaries. We then developed rational structure analysis and receptor design strategies. Focusing on

GPCRs in complex with their restive Gα subunits, we showed that inclusion of TM α-helical residues that form contacts to Gα greatly improved functionality of a light-activated β<sub>2</sub>AR receptor. Finally, we demonstrated optimization of a second receptor and tuning of spectral properties. Collectively, the major advance of this work is a demonstration of structure-guided reengineering of GPCR-Gα coupling yielding improved and diversified OptoXRs.

## METHODS

### Vectors and constructs

OptoXR genes were designed as described in the main text and ordered as synthetic genes (gBlocks, Integrated DNA Technologies). Protein and nucleotide sequences of all engineered receptors can be found in **Supplementary Table S3** and **Supplementary Table S4**, respectively. Genes were amplified in polymerase chain reactions (PCRs) using oligonucleotides with XhoI and KpnI restriction site overhangs and digested with the respective enzymes (NEB). pcDNA3.1 (Thermo Fisher Scientific) was digested with the same enzymes and ligated with the amplified receptors using T4 DNA ligase (Promega).

For β-arrestin recruitment assays, receptors were tagged with Rluc8<sup>46</sup>. Receptor genes were amplified without a stop codon using oligonucleotides with BamHI and XhoI restriction site overhangs and digested with the respective enzymes. A vector containing Rluc8 (a kind gift of P. Sexton, Monash University) was digested with the same enzymes. Receptor genes were ligated into the vector N-terminally of Rluc8 using T4 DNA ligase.

Opto-β<sub>2</sub>AR and Opto-A<sub>2A</sub>R vectors were in the same backbone and described in a previous publication<sup>47</sup>. The Opto-β<sub>2</sub>AR gene encodes for a protein that is identical to those published previously<sup>18,19</sup>. β<sub>2</sub>AR in pcDNA3 was a gift of Robert Lefkowitz (Addgene plasmid #14697)<sup>48</sup>. JellyOp in pcDNA3.1 was a kind gift of Robert Lucas<sup>16</sup>.

Single and double residue substitutions were introduced in Opto-β<sub>2</sub>AR-2.0 using overlapping oligonucleotides (designed in PrimerX (<https://www.bioinformatics.org/primerx/>) using the QuikChange option) and circular PCRs with a high-fidelity polymerase (Q5, NEB) followed by digestion with DpnI restriction enzyme (NEB).

All genes were verified using Sanger sequencing (MicroMon, Monash University).

### Cell culture

HEK293 cells (Thermo Fisher Scientific; further authenticated by assessing cell morphology and growth rate) were cultured in mycoplasma-free Dulbecco's modified Eagle medium (DMEM, Gibco) in a humidified incubator with 5% CO<sub>2</sub> atmosphere at 37°C. Medium was supplemented with 10% FBS, 100 U/ml penicillin and 0.1 mg/ml streptomycin (Gibco). HEK293 cells were reverse transfected using poly(ethyleneimine) (linear, 20 kDa;

Polysciences)<sup>49</sup>. Culture medium was changed 6 h after transfection and supplemented with 10  $\mu$ M 9-*cis*-retinal (Sigma) for experiments with light-activated receptors.

### Real-time cAMP measurements

The real-time cAMP assay employed the GloSensor-22F reporter cloned into pcDNA3.1 as described previously<sup>47</sup>. HEK293 cells were seeded at a density of  $5 \times 10^4$  cells/well in white 96-well plates and transfected with receptor and reporter at a ratio of 1:1. HEK293 cells endogenously express  $\beta_2$ AR and were mock transfected with empty vector backbone for  $\beta_2$ AR conditions. The next day, culture medium was changed to Leibovitz's L15 (Gibco) starve medium (0.5% FBS, 100 U/ml penicillin and 0.1 mg/ml streptomycin) supplemented with 2 mM D-luciferin (Cayman Chemicals) and 10  $\mu$ M 9-*cis*-retinal in experiments with light-activated receptors. Cells were incubated for 60 min at room temperature (RT). Luminescence was measured in a microplate reader (Omega, BMG Labtech). Baseline luminescence values were recorded for 8 cycles (90 s/cycle) before stimulation. Cells were stimulated with light or ligand as described in the main text and figure captions. For PTX experiments, cells were incubated with 10  $\mu$ M PTX (List Labs) overnight (o/n) at 37°C. Light stimulation employed the Xenon white light flash lamp (1 mW nominal output power, 10 ms flash separation) of the microplate reader. The experimental stimulation times scale linearly with the flash number (e.g., 2 s for 200 flashes (fl)). Wavelength was adjusted using optical filters (BMG Labtech;  $445 \pm 7.5$  nm,  $480 \pm 7.5$  nm and  $540 \pm 7.5$  nm; center wavelength ( $\lambda$ )  $\pm$  full width at half-maximum (FWHM)). Each filter was characterized using a white light source and a spectrophotometer (LI-180, Licor). Xenon lamp light output through the filters was measured using a power meter (LP-1, Sanwa). For the illuminated area of 3 mm<sup>2</sup>, the continuous illumination power density (I) was 1.75, 1.97 and 1.35 mW/cm<sup>2</sup> for 445, 480 and 540 nm continuously over the stimulation time course.

### Real-time Ca<sup>2+</sup> measurement

The real-time Ca<sup>2+</sup> mobilization assay employed mtAequorin in pcDNA3.1. HEK293 cells were seeded at a density of  $5 \times 10^4$  cells/well in white 96-well plates and transfected with receptor and reporter at a ratio of 1:1. The next day, culture medium was replaced with Hank's buffered salt solution (HBSS, Sigma) supplemented with 10  $\mu$ M coelenterazine h (Nanolight) and 10  $\mu$ M 9-*cis*-retinal in experiments with light-activated receptors. Cells were then incubated for 2 h at 37°C. Luminescence was measured in the microplate reader. Baseline luminescence values were recorded for 10 cycles (1 s/cycle) before stimulation. Cells were stimulated with light (see above) or ligand at concentrations as described in the main text and figure captions. For YM254890 experiments, cells were incubated with 10  $\mu$ M YM254890 (AdipoGen Life Sciences) for 2 h at 37°C before measurements.



## Real-time $\beta$ -arrestin2 recruitment

Receptor mediated  $\beta$ -arrestin2 recruitment was assessed using a real-time BRET assay detecting energy transfer between Rluc8-tagged receptors and a mVenus-tagged  $\beta$ -arrestin2. HEK293 cells were seeded at a density of  $5 \times 10^4$  cells/well in white 96-well plates and transfected with receptor-Rluc8 and  $\beta$ -arrestin2-mVenus at a ratio of 1:4. Culture medium was changed 6 h after transfection and supplemented with 10  $\mu$ M 9-*cis*-retinal (Sigma) for experiments with light-activated receptors. The next day, culture medium was replaced with 40  $\mu$ l HBSS supplemented and 10  $\mu$ M 9-*cis*-retinal for experiments with light-activated receptors. Cells were incubated for 1 h at 37°C. Coelenterazine h was added at a final concentration of 5  $\mu$ M immediately before measurements. Baseline values were recorded for 8 cycles (90 s/cycle) before stimulation. Cells were stimulated with light (see above) or ligand at concentrations as described in the main text and figure captions. BRET measurements were obtained in the microplate reader using 460 (Rluc8) and 520 nm (mVenus) filters. The BRET ratio was calculated by dividing the emission at 520 nm by the emission at 460 nm.

## Immunofluorescence (IF)

HEK293 cells were seeded on glass coverslips coated with poly-L-ornithine (Sigma) in clear 12-well plates ( $3 \times 10^5$  cells/well) and transfected with 1000 ng receptor plasmid. The next day, under dim red light, cells were washed once with pre-warmed PBS and then fixed with 4% PFA for 10 min at RT. Cells were washed again three times with PBS and blocked with PBS + 0.1% Tween (PBS-T) containing 3% BSA at 37°C for 1 h. Cells were incubated with primary antibody (mouse anti-4D2, 1:500 dilution; Abcam, ab98887) at 4°C o/n, washed three times with PBS, and incubated with secondary antibody (donkey anti-mouse, Alexa488 conjugated, 1:750 dilution; Thermo Fisher Scientific, A21202) at RT for 2 h. Cells were then washed once with PBS, incubated with DAPI (Life Technologies) at a final dilution of 1:4000 at RT for 5 min and washed twice with PBS. Coverslips were mounted on microscopy slides using Mowiol mounting medium (Sigma) and left to dry. Images were acquired using a inverted confocal microscope (C1, Nikon) paired with a Plan Apo VC 60x objective. Cells were imaged at 405 and 488 nm with a scan speed of 21.6 frames per s (caution was taken to avoid oversaturation at both 405 (HV = 74, laser power = 4.2) and 488 nm (HV = 82, laser power = 4.2).

## Flow cytometry (FC)

HEK293 cells were seeded in clear 6-well plates at a density of  $1 \times 10^6$  cells/well and transfected with 2000 ng receptor plasmid. The next day, under dim red light, cells were washed once with PBS and dispersed using Accutase (Sigma) at 37°C for 15 min. Accutase

was neutralized using complete medium before the cell suspension was collected in a 15 ml tube and centrifuged. After removal of supernatant, cells were fixed in 2% PFA at 37°C for 10 min and washed once with PBS. We choose permeabilizing fixation conditions for quantification of total expression levels. Cells were permeabilized with ice-cold methanol on ice for 30 min. Cells were washed twice in FC buffer (PBS supplemented with 2% FBS) and incubated with primary antibody (see above) at RT for 30 min. Cells were then washed once with FC buffer and incubated with secondary antibody (see above) at RT for 30 min. Samples, including mock transfected, unstained and secondary antibody controls, were run on the same day on a LSR Fortessa X-20 Cytometer (BD Biosciences) and data was analyzed using FlowJo software (Flowjo).

### Comparison of sequence and structure alignments

Initial comparisons of sequence alignments and structure alignments were performed on rho (PDB ID: 6CMO) and  $\beta_2$ AR (PDB ID: 3SN6) using only the receptor chain (chain R). FATCAT2.0 alignments were performed using the pairwise alignment option of the FATCAT2.0 server<sup>50</sup> (<https://fatcat.godziklab.org>). Ca atoms were included in the alignments with default alignment parameters. Alignments were manually inspected to determine whether key motifs (E/DRY, CWxP or NPxxY) were correctly paired between the first and the second receptor (e.g., Asp<sup>3x49</sup> of E/DRY of rho should be paired with Asp<sup>3x49</sup> of E/DRY of  $\beta_2$ AR).

Sequence alignments were performed in MUSCLE as previously<sup>47,51,52</sup> using the sequence of residues that are resolved in the PDB file to enable comparison to structure alignments.

For detailed comparison of FATCAT2.0 and MUSCLE alignments, rho (PDB ID: 6CMO) was also aligned to A<sub>2A</sub>AR (PDB ID: 6GDF),  $\beta_1$ AR (PDB ID: 7JJO) and M<sub>1</sub>R (PDB ID: 6OIJ) followed by quantification of identical pairs in macros written in Igor Pro (Wavemetrics) (**Supplementary Fig. S1**). These MUSCLE and FATCAT2.0 alignments were in a final step manually analyzed to assess whether OptoXR boundaries were at identical positions (**Supplementary Fig. S2**).

### GPCR-G-protein interacting residues and visualization

GPCR residues in proximity to the G $\alpha$  subunit were determined in PyMol as described in the main text and figure captions. If available, multiple receptor structures were analyzed to include all possible binding residues as listed in the figure captions. The obtained molecular contact maps were verified using a second and fully automated software (CMView<sup>53</sup>). PDB IDs of the analyzed structures were as follows for the studied receptors: Rho (6CMO, 6OYA),  $\beta_2$ AR (3SN6, 7BZ2) and A<sub>2A</sub>AR (6GDF). Molecular structure images were generated in PyMol.



## **Data analysis and statistics**

All pharmacological data were analysed using Prism (9.0, GraphPad). Dose-response data were generated by applying a three-parameter non-linear equation to data extracted from time courses. EC50 values were determined by fitting dose-response data with a sigmoid curve. Statistical measures are provided in the figure captions.

## **RESULTS**

### **Comparison of sequence- and structure-based alignments**

The creation of protein chimeras, such as OptoXRs, hinges on the exchange of functionally-equivalent domains between proteins. This is generally achieved by first aligning the proteins of interest, either as primary sequences or as three-dimensional structures, followed by identification of domain boundaries. Engineering of previous OptoXRs exclusively relied on sequence-based alignments, including the prominent chimeras of rho and adrenergic, dopamine, adenosine or muscarinic acetylcholine receptors (**Supplementary Table S1**)<sup>18,47,54</sup>. In a complementary approach, we tested whether alignments of structures would yield chimeric receptors that are different from those generated using sequences. This may indeed be the case due to the additional topological information gained and because sequence similarity between GPCRs from different families can be low (e.g., rho and  $\beta_2$ AR,  $A_{2A}$ AR,  $\beta_1$ AR and  $M_1$ R exhibit 20, 21, 22 and 23% sequence identity overall, or 21, 22, 23 and 21% when excluding extra- or intracellular termini, respectively). We performed a quantitative comparison of sequence-based alignments (using MUSCLE as in previous studies<sup>18,47</sup>) and structure-based alignments (using FATCAT2.0<sup>50</sup>). For this analysis, we utilized our own computer code that reports the number of identical residue pairs in two alignments (**Supplementary Fig. S1**). For pairs of rho and  $\beta_2$ AR,  $A_{2A}$ AR,  $\beta_1$ AR and  $M_1$ R, we found that sequence- and structure-based alignments differed in ~20 to 40% of residue pairs across the sequence (**Fig. 1c**). To determine if these differences impact the design of OptoXRs, we asked whether alignments were identical at the domain boundaries that were previously utilized to generate these chimeras (**Supplementary Fig. S2a**)<sup>19</sup>. We observed only minimal differences that were limited to one receptor pair (rho: $\beta_1$ AR) and single residues (**Fig. 1c, Supplementary Fig. S2b**). This result confirms that for these prototypical receptors and these domain boundaries the generation of OptoXR scaffolds is insensitive to the alignment method. This may not necessarily apply to all GPCR pairs as, e.g., long ICLs can potentially confound sequence alignments.

### **Receptors designs based on structural GPCR-G $\alpha$ contacts**

After comparison of alignment methods, we went on to redesign a prototypical OptoXR using a structure-guided rationale. We chose  $\beta_2$ AR as the target receptor as it is well characterized

and has been incorporated in a OptoXR previously (the new OptoXR generated here is compared to the existing Opto- $\beta_2$ AR in detail below). We closely examined structures of  $\beta_2$ AR and also of rho in complex with their cognate G-proteins ( $G\alpha_s$  for  $\beta_2$ AR and  $G\alpha_{i/t}$  for rho)<sup>36,55,56</sup>. Using a distance cutoff of 4 Å, chosen analogously to the first study mapping a GPCR-G $\alpha$  complex<sup>36</sup>, we determined the receptor residues that are in proximity to G $\alpha$  (see **Fig. 2a-d** for protein structures, and **Supplementary Fig. S3** and **Supplementary Table S2** for listed contacts). We found that these contacts extend away from the cytosolic ICLs upwards on  $\alpha$ -helices TM3, TM5 and TM6 by as much as four  $\alpha$ -helical turns (**Fig. 2b,d**). This observation prompted us to test if ILCs are sufficient for GPCR coupling. We engineered a rho receptor containing exclusively the ILCs of  $\beta_2$ AR (termed Opto- $\beta_2$ AR-Loops) and demonstrated expression and membrane localization in HEK293 cells using flow cytometry (FC) and immunofluorescence (IF) (**Fig. 2e,f**) (sequences of all engineered receptors can be found in **Supplementary Tables S3 and S4**). However, upon light stimulation ( $\lambda=480 \pm 7.5$  nm,  $I=1.97$  mW/cm<sup>2</sup>, 40 s, 4000 flashes (fl)) no increase in intracellular cAMP levels was observed, indicating that incorporation of these secondary structure elements in this particular chimeric receptor was not sufficient to confer a downstream signaling ability (**Fig. 2g,h**). We then hypothesized that including an as complete as possible ensemble of structural  $\beta_2$ AR- $G\alpha_s$  contacts will result in efficient G-protein activation. We therefore designed a variant termed Opto- $\beta_2$ AR-All-In where domain boundaries are placed to include all structural contacts (**Supplementary Fig. S3, Supplementary Table S2**). This receptor should not only perform efficiently but also provide a basis for examining the contribution of specific contact residues to function (as will be shown below). We first verified expression and localization of Opto- $\beta_2$ AR-All-In using FC and IF (**Fig. 2e,f**). We then tested receptor function upon light stimulation ( $\lambda=480 \pm 7.5$  nm,  $I=1.97$  mW/cm<sup>2</sup>, 40 s, 4000 fl) and found that Opto- $\beta_2$ AR-All-In elicited a pronounced increase of intracellular cAMP levels (>50-fold above baseline) (**Fig. 2g,h**). This result is comparable to ligand-induced  $\beta_2$ AR responses in this cell type (see below) and demonstrates that inclusion of structural contacts yielded a chimeric receptor that potently activates downstream signaling. We went on to further characterize the rationally-designed Opto- $\beta_2$ AR-All-In, which we termed Opto- $\beta_2$ AR-2.0, first in comparison to  $\beta_2$ AR, then to a previous OptoXR and finally to variants that exhibit altered contacts.

### Signaling profile of Opto- $\beta_2$ AR-2.0

We next characterized the signaling profile of Opto- $\beta_2$ AR-2.0 in comparison to  $\beta_2$ AR for multiple signaling pathways (**Fig. 3a**). We first investigated intracellular cAMP production in more detail. HEK293 cells expressing Opto- $\beta_2$ AR-2.0 or  $\beta_2$ AR were stimulated with light ( $\lambda=480 \pm 7.5$  nm,  $I=1.97$  mW/cm<sup>2</sup>, 0.01-10 s, 1-4000 fl) or the potent  $\beta$ -adrenoreceptor agonist isoproterenol (ISO) followed by real-time cAMP detection (**Fig. 3b**). Generally, cAMP levels

reached upon Opto- $\beta_2$ AR-2.0 activation were similar to those reached upon  $\beta_2$ AR activation, and both receptors exhibited dose-dependent increases (half-maximal activation light dose (LD50) for Opto- $\beta_2$ AR-2.0: 17 fI (0.17 s,  $\lambda=480 \pm 7.5$  nm,  $I=1.97$  mW/cm<sup>2</sup>, EC50 for  $\beta_2$ AR: 8.7 nM ISO) (**Fig. 3c,d**). Stimulation of Opto- $\beta_2$ AR-2.0 and  $\beta_2$ AR induced similar cAMP time courses (**Fig. 3b, Supplementary Fig. S4**).

We also investigated the ability of Opto- $\beta_2$ AR-2.0 and  $\beta_2$ AR to mobilize intracellular Ca<sup>2+</sup> in response to light or ISO. Analogous to cAMP production, both receptors induced dose-dependent Ca<sup>2+</sup> signals to similar maximal levels (**Fig. 3e-h**). As for cAMP production, reversal to basal Ca<sup>2+</sup> levels was marginally more rapid for Opto- $\beta_2$ AR-2.0 than  $\beta_2$ AR (**Fig. 3e,g**). GPCRs can induce intracellular Ca<sup>2+</sup> mobilization through multiple pathways, including the canonical G $\alpha_q$  axis. To test whether  $\beta_2$ AR and Opto- $\beta_2$ AR-2.0 activate Ca<sup>2+</sup> *via* this axis, we applied the G $\alpha_q$  inhibitor YM254890 (YM)<sup>57</sup> and found that it indeed abolished signaling downstream of both receptors (**Fig. 3e,g**).

The general agreement between Opto- $\beta_2$ AR-2.0 and  $\beta_2$ AR signaling observed for G-protein dependent pathways did strikingly not extend to  $\beta$ -arrestin.  $\beta_2$ AR, like many other GPCRs, exhibits the ability to induce outcomes downstream of G-proteins and  $\beta$ -arrestin in a ligand-dependent manner. We quantified  $\beta$ -arrestin2 recruitment to  $\beta_2$ AR and Opto- $\beta_2$ AR-2.0 using sensitive bioluminescence resonance energy transfer assays (BRET) (**Supplementary Fig. S5a**).  $\beta_2$ AR recruited  $\beta$ -arrestin2 in a dose-dependent manner with a half-maximal effective ISO dose similar to that observed for cAMP induction (EC50: 18 nM; **Supplementary Fig. S5b,c**). However, we did not observe any light-dependent  $\beta$ -arrestin recruitment for Opto- $\beta_2$ AR-2.0 even at high light doses ( $\lambda=480 \pm 7.5$  nm,  $I=1.97$  mW/cm<sup>2</sup>, 40 s, 4000 fI) (**Supplementary Fig. S5d**) pointing to a preference of Opto- $\beta_2$ AR-2.0 for G $\alpha$ -coupled pathways. It is noteworthy that  $\beta$ -arrestin recruitment has not been examined in earlier studies of  $\beta_2$ AR OptoXRs (as discussed below). The result that  $\beta_2$ AR and a  $\beta_2$ AR OptoXR receptor exhibit distinct behavior may not be entirely surprising. TM domains contribute to active state conformations and kinetics and ultimately signaling bias<sup>58-60</sup> and these domains are different in  $\beta_2$ AR and the rho chimera. Collectively, we found striking similarities but also differences in the signaling responses elicited by Opto- $\beta_2$ AR-2.0 and  $\beta_2$ AR.

### Optical activation profile and comparison to earlier Opto- $\beta_2$ AR

We went on to characterize the optical activation profile of Opto- $\beta_2$ AR and also compared it to an earlier  $\beta_2$ AR OptoXR<sup>18,19,26</sup>. We found that whilst light stimulation for 2 s ( $\lambda=480 \pm 7.5$  nm,  $I=1.97$  mW/cm<sup>2</sup>, 200 fI) was required to produce saturating cAMP levels, even a single 10 ms light flash induced a signal that was sizeable (~10% of maximal cAMP induction) and transient (decay in 7.5 min and thus faster than the decay after application of the amplitude-equivalent dose of 10 nM ISO) (**Fig. 4a, Supplementary Fig. S4**). Opto- $\beta_2$ AR-2.0 employs

rho as light-sensing photoreceptor core which is sensitive to blue-green light across a relatively broad wavelength range (maximal absorption wavelength: 500 nm, FWHM:  $\sim 100$  nm)<sup>61,62</sup>. We confirmed the spectral sensitivity of Opto- $\beta_2$ AR-2.0 by stimulating cells with light of different wavelengths (**Fig. 4b**). As expected given the broad absorption peak, Opto- $\beta_2$ AR-2.0 could be activated at  $480 \pm 7.5$  nm (the closest wavelength to 500 nm available to us;  $I=1.97$  mW/cm<sup>2</sup>) as well as at  $445 \pm 7.5$  nm and  $540 \pm 7.5$  nm ( $I=1.75$  and  $1.35$  mW/cm<sup>2</sup>, 0.01-10 s, 1-1000 fl).

In the seminal study of Kim *et al.*<sup>19</sup>, a  $\beta_2$ AR OptoXR was designed using a screening approach and this receptor was later expressed *in vivo* and *ex vivo*<sup>18,26</sup>. Following the current convention, we refer to this earlier receptor as Opto- $\beta_2$ AR whilst our receptors carry further labels (e.g., the label 2.0; the domain boundaries of Opto- $\beta_2$ AR and Opto- $\beta_2$ AR-2.0 shown side-by-side in **Supplementary Fig. S3**). We compared the efficiency of Opto- $\beta_2$ AR-2.0 to Opto- $\beta_2$ AR and found that Opto- $\beta_2$ AR-2.0 generated larger maximal signals (by 7.2 fold) and produced half-maximal signals at 4.8-fold lower light doses (**Fig. 4c**) (LD50 of Opto- $\beta_2$ AR: 82 fl, 0.82s; LD50 of Opto- $\beta_2$ AR-2.0: 17 fl, 0.17s; in both cases  $\lambda=480 \pm 7.5$  nm,  $I=1.97$  mW/cm<sup>2</sup>; expression levels were comparable, **Supplementary Fig. S6**). On the time scale of our longest repetition experiments ( $\sim 1.5$  h), cAMP signals generated by Opto- $\beta_2$ AR-2.0 were even comparable to the potent jellyfish opsin JellyOp<sup>16</sup> (**Supplementary Fig. S7**). One further notable observation was that the activity of Opto- $\beta_2$ AR, but not that of Opto- $\beta_2$ AR-2.0 or  $\beta_2$ AR, was sensitive to the G $\alpha_i$  inhibitor PTX (**Supplementary Fig. S8**). This result suggests that the original Opto- $\beta_2$ AR exhibited a signaling activity that is in this cell type not representative of  $\beta_2$ AR but may be relevant in the context of previous and future applications of this earlier receptor. Understanding the mechanism underlying this activity requires separate further study as it cannot be attributed to the absence/presence of structural GPCR-G $\alpha$  contacts: (i) no rho-G $\alpha_{i/o/t}$  contact residues remain in Opto- $\beta_2$ AR (**Supplementary Fig. S3**) and (ii) G $\alpha_s$  and G $\alpha_i$  associate with the homologous  $\beta_1$ AR receptor through an overlapping ensemble of residues<sup>63</sup> all of which are present in  $\beta_2$ AR and Opto- $\beta_2$ AR-2.0. While the effect of PTX was pronounced, cAMP production by Opto- $\beta_2$ AR even under conditions of G $\alpha_i$  inhibition was still several fold below that of Opto- $\beta_2$ AR-2.0 (**Supplementary Fig. S8**). Collectively, these data show that Opto- $\beta_2$ AR-2.0 is an efficient optical actuator that offers higher potency and specificity than its closest known OptoXR relative.

### Contributions of contact residues to Opto- $\beta_2$ AR-2.0 function

We next tested if the functional contribution of individual structural contacts can be quantified in Opto- $\beta_2$ AR-2.0. We examined key residues that (i) are located in the three main receptor domains that were exchanged between rho and  $\beta_2$ AR (TM3-ICL2-TM4, TM5-ICL3-TM6 and TM7-C), (ii) form contacts (e.g., hydrophobic interactions or charge-charge interactions) to G $\alpha_s$  and (iii) are present in Opto- $\beta_2$ AR-2.0 but absent in Opto- $\beta_2$ AR. In the domains TM3-ICL2-

TM4 and TM5-ICL3-TM6, we focused on I139<sup>3x54</sup> and L270<sup>6x37</sup> that form hydrophobic contacts to Gα<sub>s</sub> (in both cases through Cδ side chain atoms<sup>36</sup>; residue numbers correspond to the Opto-β<sub>2</sub>AR-2.0 sequence and, in superscript, to the GPCRdb numbering scheme<sup>64</sup>). Upon substitution of these residues to the corresponding rho residues present in Opto-β<sub>2</sub>AR (I139<sup>3x54</sup>V and L270<sup>6x37</sup>V; Val does not contain a Cδ atom), we found reduced cAMP induction by 15 and 25% as well as ~2-fold reduced LD50 values (33.3 fl, 0.34 s and 32.9 fl, 0.33 s, respectively; in both cases λ=480 ± 7.5 nm, I=1.97 mW/cm<sup>2</sup>) (**Fig. 4d**). A I139<sup>3x54</sup>V L270<sup>6x37</sup>V double mutant resulted in further loss of function (LD50 34.4 flashes, 0.35 s, 44% reduced cAMP induction) (**Fig. 4d**). We also investigated TM7. Specifically, residue R335<sup>7x55</sup> at the cytoplasmic end of this TM α-helix has been implicated in Gα<sub>s</sub>-binding through a charge-charge contact to residue E392<sup>H5.24</sup> of Gα<sub>s</sub> in structural studies and molecular dynamics simulations<sup>43,65</sup>. A deleterious substitution (R335L<sup>7x55</sup>; modelled after a naturally observed receptor variant<sup>66</sup>) resulted in maximal cAMP levels that were reduced by 42% (LD50: 36.6 fl, 0.37s, λ=480 ± 7.5 nm, I=1.97 mW/cm<sup>2</sup>) (**Fig. 4e**). Overall, the function of Opto-β<sub>2</sub>AR-2.0 is indeed sensitive to substitution of newly-introduced residues that were identified in structural GPCR-Gα complex analysis.

### Structure-guided receptors as a development platform

We went on to demonstrate consequences of the optimization approach. Above exploration of contact residues was assisted by the large signals generated by Opto-β<sub>2</sub>AR-2.0: A quantitative analysis could still be performed despite a marked reduction in activity because of residue substitutions. We reasoned that the potency of Opto-β<sub>2</sub>AR-2.0 may also enable experiments where the photosensitive domain of the receptor is engineered as also this manipulation may be associated with reduced function. Of importance in optogenetic tool development is an availability of actuator proteins with sensitivities to different wavelengths ("blue-shifting" (towards lower maximal absorption wavelengths) or "red-shifting" (towards higher maximal absorption wavelengths))<sup>67-70</sup>. This is generally achieved either through identification of naturally-occurring spectrally-diverse photoreceptors, e.g. cone opsins in the case of GPCRs<sup>11</sup>, or through tuning of photoreceptors using substitutions in their chromophore binding pockets<sup>71,72</sup>. Binding pocket mutagenesis can be associated with reduced function in opsins<sup>73-76</sup>, which is one possible reason why spectral tuning using mutagenesis has never been demonstrated in OptoXRs. Indeed, when introducing three substitutions in the original Opto-β<sub>2</sub>AR that were previously shown to blue-shift rho absorption by ~50 nm<sup>75</sup> (T118<sup>3x33</sup>A, E122<sup>3x37</sup>D and A318<sup>7x39</sup>S; residue numbers correspond to Opto-β<sub>2</sub>AR-2.0/GPCRdb numbering; **Fig. 5a**), no light-induced activity could be detected (λ=480 ± 7.5 nm, I=1.97 mW/cm<sup>2</sup>, 0.01-10 s, 1-1000 fl) (**Fig. 5b**). In turn, introduction of the same residues in Opto-β<sub>2</sub>AR-2.0 resulted in a blue-shifted variant (termed Opto-β<sub>2</sub>AR-2.0-Blue) that induced cAMP



to levels that were comparable to previous non-shifted OptoXRs ( $\lambda=480 \pm 7.5$  nm,  $I=1.97$  mW/cm<sup>2</sup>, 0.01-10 s, 1-1000 fI) (**Fig. 5c**). As expected, in the spectrally tuned Opto- $\beta_2$ AR-2.0-Blue sensitivity to blue light was maximal and to green light reduced (**Fig. 5c**).

We also explored whether a GPCR-G $\alpha$  contact-based redesign may be applicable to a further receptor (**Fig. 5d**). We have previously developed a light-activated A<sub>2A</sub>R (Opto-A<sub>2A</sub>R) and characterized its function in highly-sensitive because integrative transcriptional reporter assays<sup>47</sup>. Analogously as for Opto- $\beta_2$ AR-2.0 above, we determined G-protein proximal residues in the A<sub>2A</sub>R receptor structure<sup>38</sup> to inform the placement of domain boundaries following the “All-In”-rationale. We termed the resulting receptor Opto-A<sub>2A</sub>R-2.0. Opto-A<sub>2A</sub>R-2.0 also contained additional A<sub>2A</sub>R residues in TM3, TM6 and the C-terminus when compared to Opto-A<sub>2A</sub>R (**Supplementary Tables S3 and S4**). We went on to test the ability of both receptors to induce cAMP responses and found that only Opto-A<sub>2A</sub>R-2.0 resulted in detectable activation in the real-time assays (**Fig. 5e,f**). Thus the structure-guided approach permitted generation of a functionally improved A<sub>2A</sub>R OptoXR.

## DISCUSSION

GPCRs relay diverse extracellular signals to specific downstream signaling pathways and thereby regulate essential physiology. To control GPCR signaling with spatio-temporal precision, chimeric light-activated OptoXRs have been developed and deployed alongside repurposed naturally-occurring opsins<sup>20,21</sup>. The design of most published OptoXRs relied on domain boundaries that were proposed in a seminal study<sup>19</sup>. Notably, this recipe was formulated at a time when few high-resolution structures were available for GPCRs and none for GPCR-G-protein complexes. The past fifteen years have seen the emergence of detailed structures depicting >150 unique GPCRs and >50 unique GPCR-signaling-protein complexes<sup>1,30</sup>. Here, we utilized some of this structural information for rational improvement of OptoXRs. First, we evaluated if sequence alignments and structure alignments yield the same chimeric receptor backbones. For our set of prototypical receptors and domain boundaries this was the case. Second, we identified receptor residues that are proximal to G $\alpha$ -subunits to position the domain boundaries in modified chimeric receptors. We found that an “All-In”-rationale, which incorporates the three ILCs, the C-terminus and the identified structural GPCR-G $\alpha$  contact regions, markedly improved the function of a  $\beta_2$ AR OptoXR. These modifications, along with a non-functional chimeric receptor that contained only the ICLs of  $\beta_2$ AR, demonstrated how TM  $\alpha$ -helical residues contribute to efficient downstream coupling. As we incorporated all residues identified in the complex structure, a rationale for further optimization is not directly evident (see below for a test of the contribution of inserted residues). The approach we have taken is structure-based and thus fundamentally different from, e.g.,



the screening-based methods employed on OptoXRs previously or on GPCR-based fluorescent sensors. In Opto- $\beta_2$ AR-2.0, many of the incorporated TM  $\alpha$ -helical residues (e.g., I139<sup>3x54</sup>, L280<sup>6x37</sup> or R335<sup>7x55</sup>) are conserved in  $G\alpha_s$ -coupled aminergic (including adrenergic) receptors but not in non- $G\alpha_s$ -coupled receptors. Our comparison of Opto- $\beta_2$ AR-2.0 and a previous Opto- $\beta_2$ AR, which retained rho residues at the corresponding sites, and a reverse experiment in which we substituted these residues in Opto- $\beta_2$ AR-2.0, confirmed their contributions to function. In addition, our analysis also rationalizes previous findings that omission of larger structural domains of  $\beta_2$ AR, e.g. entire intracellular domains, resulted in reduced activity of chimeric GPCRs<sup>16,19,27</sup>.

Our work is complementary to two elegant recent studies in which coupling downstream of GPCRs was altered using structural information. Using simulations of terminal  $G\alpha$   $\alpha$ -helices in combination with functional assays, Sandhu *et al.* generated a triple mutant adrenoreceptor with more promiscuous downstream coupling, in particular leading to more potent activation of  $G\alpha_q$  compared to the WT receptor<sup>43</sup>. Using structure modeling and *in silico* and experimental mutagenesis, Young *et al.* engineered orthogonal receptor- $G\alpha$ -pairs that interacted specifically and independently of their endogenous counterparts<sup>42</sup>. Collectively, these studies and our work demonstrate separate advances towards several design objectives (coupling switch, promiscuity or orthogonality) using distinct strategies (chimeric receptors or mutagenesis).

One element of our study was examination to which degree this OptoXR recapitulates the function of the ligand-activated target receptor. GPCRs assume distinct ligand-dependent active states and state lifetimes that lead to preferred activation of some of the available signaling pathways over others<sup>58-60,77-79</sup>. OptoXR activation likewise was associated with a particular signaling profile. Given pronounced differences between rho and  $\beta_2$ AR, it may not be surprising that the signaling profile of Opto- $\beta_2$ AR-2.0 was not identical to that of  $\beta_2$ AR. In particular, we were unable to detect  $\beta$ -arrestin recruitment for Opto- $\beta_2$ AR-2.0 and thus under the conditions examined here the activity of Opto- $\beta_2$ AR-2.0 resembled that of  $\beta_2$ AR in response to G-protein-biased ligands, such as pepducins<sup>80</sup>. It is noteworthy that an ability to predominantly activate G-protein pathways may be desirable in some physiological scenarios<sup>80,81</sup>. This result may also be relevant in the context of an earlier study that proposed the development of a “functionally-selective” Opto- $\beta_2$ AR with limited  $G\alpha_s$  signaling but induction of pathways that are known to be downstream of  $\beta$ -arrestin<sup>26</sup>. Notably,  $\beta$ -arrestin recruitment was not explored in this study and selectivity was achieved through mutagenesis of key functional motifs which were (i) located within the rho core and (ii) present in most Class A GPCRs (e.g., the highly-conserved Tyr<sup>3x51</sup> of the E/DRY motif or a further tyrosine (Tyr<sup>5x58</sup>) that participates in active-state-specific interactions)<sup>26,31</sup>. Because of the placement of these

substitutions in rho domains (as opposed to in  $\beta_2$ AR-derived domains as here), a comparison of the previous results and ours is not possible.

The large signaling response elicited by Opto- $\beta_2$ AR-2.0 prompted us to explore further capabilities of OptoXRs. We introduced a spectral absorption shift to the rho core of Opto- $\beta_2$ AR-2.0 to diversify function. The blue-shifted receptor may complement blue-light sensitive cone opsins that activate opposing signaling responses ( $G\alpha_{i/o}$  instead of  $G\alpha_s$ )<sup>11</sup>. Mutagenesis in binding pockets are associated with reduced protein folding and function in many protein families including opsins<sup>73-76</sup>. Indeed, we observed that substitution of three residues in proximity of the retinal cofactor impacted the function of the original Opto- $\beta_2$ AR such that we were not able to detect changes in cAMP levels. In contrast, Opto- $\beta_2$ AR-2.0-Blue induced changes that were even comparable to those produced by earlier unperturbed OptoXRs. Finally, again prompted by the functional improvement observed in Opto- $\beta_2$ AR-2.0, we went on to show that a structure-guided approach can also be applied to generate Opto-A<sub>2A</sub>R-2.0.

Structural biology has had a profound impact on the field of optogenetics, e.g. by enabling the rational design of light-activated ion channels, enzymes and protein-protein interactions<sup>71,73,82</sup>. We show that rational exchange of receptor domains resulted in more potent OptoXRs and enabled OptoXRs with new functions. However, because this is the first demonstration of structure-guided coupling engineering in OptoXRs, and one of very few in GPCRs in general<sup>42,43</sup>, further studies are required to test how universal this approach is. It is interesting to note that the temporal sequence of events driving the association of the G-protein to a GPCR is an active area of study. It is possible that this association initially involves intermediate receptor states and consequently contacts other than those observed in the stable GPCR-G-protein complexes; however, such contacts have not yet been identified<sup>65,83,84</sup> and thus cannot be incorporated in a receptor design. OptoXRs may in the future support time-resolved studies of these binding events by providing non-invasive activation tools, similarly to successful photoreceptor applications in spectroscopy or drug discovery<sup>85,86</sup>. In addition to serving as an experimental platform, targeted OptoXRs may also continue to make contributions towards understanding the impact of signaling on cells and cellular networks.

## **AUTHOR CONTRIBUTIONS**

Conceptualization, A.M.T., E.J.G. and H.J.; Funding Acquisition, E.J.G. and H.J.; Methodology, A.M.T., W.L.S., E.J.G. and H.J.; Project Administration, H.J.; Investigation, A.M.T., W.L.S. and E.J.G.; Data curation, A.M.T., W.L.S., E.J.G. and H.J.; Supervision, E.J.G. and H.J.; Writing - Original Draft, A.M.T. and H.J.; Writing - Review and Editing, H.J.

## **ACKNOWLEDGEMENTS**

We thank M. Halls and P. Sexton for materials and advice. This study was supported by grants of the Australian Research Council (DP200102093, to H.J.), the National Health and Medical Research Council (APP1187638, to H.J.) and a fellowship of the Synthetic Biology Future Science Platform of the Commonwealth Scientific and Industrial Research Organisation (to E.J.G.). The Australian Regenerative Medicine Institute is supported by grants from the State Government of Victoria and the Australian Government. The EMBL Australia Partnership Laboratory (EMBL Australia) is supported by the National Collaborative Research Infrastructure Strategy (NCRIS) of the Australian Government. MicroMon of Monash University provided Sanger sequencing services.

## **CONFLICT OF INTEREST**

The authors declare no conflict of interest.

## REFERENCES

1. Kooistra, A.J. et al. GPCRdb in 2021: integrating GPCR sequence, structure and function. *Nucleic Acids Res* **49**, D335-D343 (2021).
2. Insel, P.A. et al. GPCRomics: An approach to discover GPCR drug targets. *Trends Pharmacol Sci* **40**, 378-387 (2019).
3. Sriram, K. & Insel, P.A. G Protein-Coupled Receptors as Targets for Approved Drugs: How Many Targets and How Many Drugs? *Mol Pharmacol* **93**, 251-258 (2018).
4. Hauser, A.S., Attwood, M.M., Rask-Andersen, M., Schioth, H.B. & Gloriam, D.E. Trends in GPCR drug discovery: new agents, targets and indications. *Nat Rev Drug Discov* **16**, 829-842 (2017).
5. Flock, T. et al. Selectivity determinants of GPCR-G-protein binding. *Nature* **545**, 317-322 (2017).
6. Atwood, B.K., Lopez, J., Wager-Miller, J., Mackie, K. & Straiker, A. Expression of G protein-coupled receptors and related proteins in HEK293, AtT20, BV2, and N18 cell lines as revealed by microarray analysis. *BMC Genomics* **12**, 14 (2011).
7. Oldham, W.M. & Hamm, H.E. Heterotrimeric G protein activation by G-protein-coupled receptors. *Nat Rev Mol Cell Biol* **9**, 60-71 (2008).
8. Marti-Solano, M. et al. Combinatorial expression of GPCR isoforms affects signalling and drug responses. *Nature* **587**, 650-656 (2020).
9. Tichy, A.M., Gerrard, E.J., Sexton, P.M. & Janovjak, H. Light-activated chimeric GPCRs: limitations and opportunities. *Curr Opin Struct Biol* **57**, 196-203 (2019).
10. Kleinlogel, S. Optogenetic user's guide to Opto-GPCRs. *Front Biosci* **21**, 794-805 (2016).
11. Masseck, O.A. et al. Vertebrate cone opsins enable sustained and highly sensitive rapid control of Gi/o signaling in anxiety circuitry. *Neuron* **81**, 1263-73 (2014).
12. Karunaratne, W.K., Giri, L., Kalyanaraman, V. & Gautam, N. Optically triggering spatiotemporally confined GPCR activity in a cell and programming neurite initiation and extension. *Proc Natl Acad Sci U S A* **110**, E1565-74 (2013).
13. Li, X. et al. Fast noninvasive activation and inhibition of neural and network activity by vertebrate rhodopsin and green algae channelrhodopsin. *Proc Natl Acad Sci USA* **102**, 17816-21 (2005).
14. Copits, B.A. et al. A photoswitchable GPCR-based opsin for presynaptic inhibition. *Neuron* **109**, 1791-1809 e11 (2021).
15. Mahn, M. et al. Efficient optogenetic silencing of neurotransmitter release with a mosquito rhodopsin. *Neuron* **109**, 1621-1635 e8 (2021).
16. Bailes, H.J., Zhuang, L.Y. & Lucas, R.J. Reproducible and sustained regulation of Galphas signalling using a metazoan opsin as an optogenetic tool. *PLoS One* **7**, e30774 (2012).
17. Zemelman, B.V., Lee, G.A., Ng, M. & Miesenbock, G. Selective photostimulation of genetically chARGed neurons. *Neuron* **33**, 15-22 (2002).
18. Airan, R.D., Thompson, K.R., Fenno, L.E., Bernstein, H. & Deisseroth, K. Temporally precise in vivo control of intracellular signalling. *Nature* **458**, 1025-9 (2009).
19. Kim, J.M. et al. Light-driven activation of beta 2-adrenergic receptor signaling by a chimeric rhodopsin containing the beta 2-adrenergic receptor cytoplasmic loops. *Biochemistry* **44**, 2284-92 (2005).
20. Wiegert, J.S., Mahn, M., Prigge, M., Printz, Y. & Yizhar, O. Silencing neurons: tools, applications, and experimental constraints. *Neuron* **95**, 504-529 (2017).
21. Spangler, S.M. & Bruchas, M.R. Optogenetic approaches for dissecting neuromodulation and GPCR signaling in neural circuits. *Curr Opin Pharmacol* **32**, 56-70 (2017).
22. Iwai, Y. et al. Transient astrocytic Gq signaling underlies remote memory enhancement. *Front Neural Circuits* **15**, 658343 (2021).

23. van Wyk, M., Pielecka-Fortuna, J., Lowel, S. & Kleinlogel, S. Restoring the ON switch in blind retinas: Opto-mGluR6, a next-generation, cell-tailored optogenetic tool. *PLoS Biol* **13**, e1002143 (2015).
24. Xu, Y. et al. Optogenetic control of chemokine receptor signal and T-cell migration. *Proc Natl Acad Sci U S A* **111**, 6371-6 (2014).
25. Siuda, E.R. et al. Spatiotemporal control of opioid signaling and behavior. *Neuron* **86**, 923-35 (2015).
26. Siuda, E.R. et al. Optodynamic simulation of beta-adrenergic receptor signalling. *Nat Commun* **6**, 8480 (2015).
27. Hickey, D.G. et al. Chimeric human opsins as optogenetic light sensitizers. *J Exp Biol* **224**(2021).
28. Berry, M.H. et al. Restoration of high-sensitivity and adapting vision with a cone opsin. *Nat Commun* **10**, 1221 (2019).
29. Cehajic-Kapetanovic, J. et al. Restoration of vision with ectopic expression of human rod opsin. *Curr Biol* **25**, 2111-22 (2015).
30. Congreve, M., de Graaf, C., Swain, N.A. & Tate, C.G. Impact of GPCR structures on drug discovery. *Cell* **181**, 81-91 (2020).
31. Zhou, Q. et al. Common activation mechanism of class A GPCRs. *Elife* **8**(2019).
32. Wootten, D., Christopoulos, A., Marti-Solano, M., Babu, M.M. & Sexton, P.M. Mechanisms of signalling and biased agonism in G protein-coupled receptors. *Nat Rev Mol Cell Biol* **19**, 638-653 (2018).
33. Weis, W.I. & Kobilka, B.K. The Molecular Basis of G Protein-Coupled Receptor Activation. *Annu Rev Biochem* **87**, 897-919 (2018).
34. Gurevich, V.V. & Gurevich, E.V. Molecular mechanisms of GPCR signaling: A structural perspective. *Int J Mol Sci* **18**(2017).
35. Venkatakrisnan, A.J. et al. Diverse activation pathways in class A GPCRs converge near the G-protein-coupling region. *Nature* **536**, 484-7 (2016).
36. Rasmussen, S.G. et al. Crystal structure of the beta2 adrenergic receptor-Gs protein complex. *Nature* **477**, 549-55 (2011).
37. Munk, C. et al. An online resource for GPCR structure determination and analysis. *Nat Methods* **16**, 151-162 (2019).
38. Garcia-Nafria, J., Lee, Y., Bai, X., Carpenter, B. & Tate, C.G. Cryo-EM structure of the adenosine A2A receptor coupled to an engineered heterotrimeric G protein. *Elife* **7**(2018).
39. Liang, Y.L. et al. Phase-plate cryo-EM structure of a class B GPCR-G-protein complex. *Nature* **546**, 118-123 (2017).
40. Glukhova, A. et al. Rules of engagement: GPCRs and G proteins. *ACS Pharm Transl Sci* **1**, 73-83 (2018).
41. Keri, D. & Barth, P. Reprogramming G protein coupled receptor structure and function. *Curr Opin Struct Biol* **51**, 187-194 (2018).
42. Young, M. et al. Computational design of orthogonal membrane receptor-effector switches for rewiring signaling pathways. *Proc Natl Acad Sci U S A* **115**, 7051-7056 (2018).
43. Sandhu, M. et al. Conformational plasticity of the intracellular cavity of GPCR-G-protein complexes leads to G-protein promiscuity and selectivity. *Proc Natl Acad Sci U S A* **116**, 11956-11965 (2019).
44. Nakajima, K. & Wess, J. Design and functional characterization of a novel, arrestin-biased designer G protein-coupled receptor. *Mol Pharmacol* **82**, 575-82 (2012).
45. Guettier, J.M. et al. A chemical-genetic approach to study G protein regulation of beta cell function in vivo. *PNAS* **106**, 19197-202 (2009).
46. Savage, E.E., Wootten, D., Christopoulos, A., Sexton, P.M. & Furness, S.G. A simple method to generate stable cell lines for the analysis of transient protein-protein interactions. *Biotechniques* **54**, 217-21 (2013).
47. Morri, M. et al. Optical functionalization of human class A orphan G-protein-coupled receptors. *Nat Commun* **9**, 1950 (2018).



48. Tang, Y. et al. Identification of the endophilins (SH3p4/p8/p13) as novel binding partners for the beta1-adrenergic receptor. *Proc Natl Acad Sci U S A* **96**, 12559-64 (1999).
49. Tichy, A.M., Gerrard, E.J., Legrand, J.M.D., Hobbs, R.M. & Janovjak, H. Engineering strategy and vector library for the rapid generation of modular light-controlled protein-protein interactions. *J Mol Biol* **431**, 3046-3055 (2019).
50. Li, Z., Jaroszewski, L., Iyer, M., Sedova, M. & Godzik, A. FATCAT 2.0: towards a better understanding of the structural diversity of proteins. *Nucleic Acids Res* **48**, W60-W64 (2020).
51. Madeira, F. et al. The EMBL-EBI search and sequence analysis tools APIs in 2019. *Nucleic Acids Res* **47**, W636-W641 (2019).
52. Edgar, R.C. MUSCLE: a multiple sequence alignment method with reduced time and space complexity. *BMC Bioinform* **5**, 113 (2004).
53. Vehlouw, C. et al. CMView: interactive contact map visualization and analysis. *Bioinformatics* **27**, 1573-4 (2011).
54. Gunaydin, L.A. et al. Natural neural projection dynamics underlying social behavior. *Cell* **157**, 1535-51 (2014).
55. Gao, Y. et al. Structures of the rhodopsin-transducin complex: Insights into G-protein activation. *Mol Cell* **75**, 781-790 e3 (2019).
56. Kang, Y. et al. Cryo-EM structure of human rhodopsin bound to an inhibitory G protein. *Nature* **558**, 553-558 (2018).
57. Takasaki, J. et al. A novel Galphaq/11-selective inhibitor. *J Biol Chem* **279**, 47438-45 (2004).
58. Lamichhane, R. et al. Biased signaling of the G-Protein-coupled receptor beta2AR is governed by conformational exchange kinetics. *Structure* **28**, 371-377 e3 (2020).
59. McCorvy, J.D. et al. Structure-inspired design of beta-arrestin-biased ligands for aminergic GPCRs. *Nat Chem Biol* **14**, 126-134 (2018).
60. Liu, J.J., Horst, R., Katritch, V., Stevens, R.C. & Wuthrich, K. Biased signaling pathways in beta2-adrenergic receptor characterized by 19F-NMR. *Science* **335**, 1106-10 (2012).
61. Govardovskii, V.I., Fyhrquist, N., Reuter, T., Kuzmin, D.G. & Donner, K. In search of the visual pigment template. *Vis Neurosci* **17**, 509-28 (2000).
62. Partridge, J.C. & De Grip, W.J. A new template for rhodopsin (vitamin A1 based) visual pigments. *Vision Res* **31**, 619-30 (1991).
63. Alegre, K.O. et al. Structural basis and mechanism of activation of two different families of G proteins by the same GPCR. *Nat Stru Mol Biol* **28**, 936-944 (2021).
64. Isberg, V. et al. Generic GPCR residue numbers - aligning topology maps while minding the gaps. *Trends Pharmacol Sci* **36**, 22-31 (2015).
65. Ma, X. et al. Analysis of beta2AR-Gs and beta2AR-Gi complex formation by NMR spectroscopy. *Proc Natl Acad Sci U S A* **117**, 23096-23105 (2020).
66. Hauser, A.S. et al. Pharmacogenomics of GPCR Drug Targets. *Cell* **172**, 41-54 e19 (2018).
67. Forli, A., Pisoni, M., Printz, Y., Yizhar, O. & Fellin, T. Optogenetic strategies for high-efficiency all-optical interrogation using blue-light-sensitive opsins. *Elife* **10**(2021).
68. Hochbaum, D.R. et al. All-optical electrophysiology in mammalian neurons using engineered microbial rhodopsins. *Nat Methods* **11**, 825-33 (2014).
69. Lin, J.Y., Knutsen, P.M., Muller, A., Kleinfeld, D. & Tsien, R.Y. ReaChR: a red-shifted variant of channelrhodopsin enables deep transcranial optogenetic excitation. *Nat Neurosci* **16**, 1499-508 (2013).
70. Tabor, J.J., Levskaya, A. & Voigt, C.A. Multichromatic control of gene expression in Escherichia coli. *J Mol Biol* **405**, 315-24 (2011).
71. Ziegler, T. & Moglich, A. Photoreceptor engineering. *Front Mol Biosci* **2**, 30 (2015).
72. O'Neill, P.R. & Gautam, N. Optimizing optogenetic constructs for control over signaling and cell behaviours. *Photochem Photobiol Sci* **14**, 1578-85 (2015).



73. Deisseroth, K. & Hegemann, P. The form and function of channelrhodopsin. *Science* **357**, 6356 (2017).
74. Singhal, A. et al. Structural role of the T94I rhodopsin mutation in congenital stationary night blindness. *EMBO Rep* **17**, 1431-1440 (2016).
75. Janz, J.M. & Farrens, D.L. Engineering a functional blue-wavelength-shifted rhodopsin mutant. *Biochemistry* **40**, 7219-27 (2001).
76. Lin, S.W. et al. Mechanisms of spectral tuning in blue cone visual pigments. Visible and raman spectroscopy of blue-shifted rhodopsin mutants. *J Biol Chem* **273**, 24583-91 (1998).
77. Wingler, L.M. & Lefkowitz, R.J. Conformational basis of G protein-coupled receptor signaling versatility. *Trends Cell Biol* **30**, 736-747 (2020).
78. Violin, J.D., Crombie, A.L., Soergel, D.G. & Lark, M.W. Biased ligands at G-protein-coupled receptors: promise and progress. *Trends Pharmacol Sci* **35**, 308-16 (2014).
79. Shonberg, J. et al. Biased agonism at G protein-coupled receptors: the promise and the challenges--a medicinal chemistry perspective. *Med Res Rev* **34**, 1286-330 (2014).
80. Carr, R., 3rd et al. Development and characterization of pepducins as Gs-biased allosteric agonists. *J Biol Chem* **289**, 35668-84 (2014).
81. Billington, C.K., Ojo, O.O., Penn, R.B. & Ito, S. cAMP regulation of airway smooth muscle function. *Pulm Pharmacol Ther* **26**, 112-20 (2013).
82. Dagliyan, O. & Hahn, K.M. Controlling protein conformation with light. *Curr Opin Struct Biol* **57**, 17-22 (2019).
83. Ahn, D., Ham, D. & Chung, K.Y. The conformational transition during G protein-coupled receptor (GPCR) and G protein interaction. *Curr Opin Struct Biol* **69**, 117-123 (2021).
84. Du, Y. et al. Assembly of a GPCR-G protein complex. *Cell* **177**, 1232-1242 e11 (2019).
85. Agus, V. & Janovjak, H. Optogenetic methods in drug screening: technologies and applications. *Curr Opin Biotechnol* **48**, 8-14 (2017).
86. Kottke, T., Lorenz-Fonfria, V.A. & Heberle, J. The grateful infrared: Sequential protein structural changes resolved by infrared difference spectroscopy. *J Phys Chem B* **121**, 335-350 (2017).

## FIGURES AND FIGURE CAPTIONS

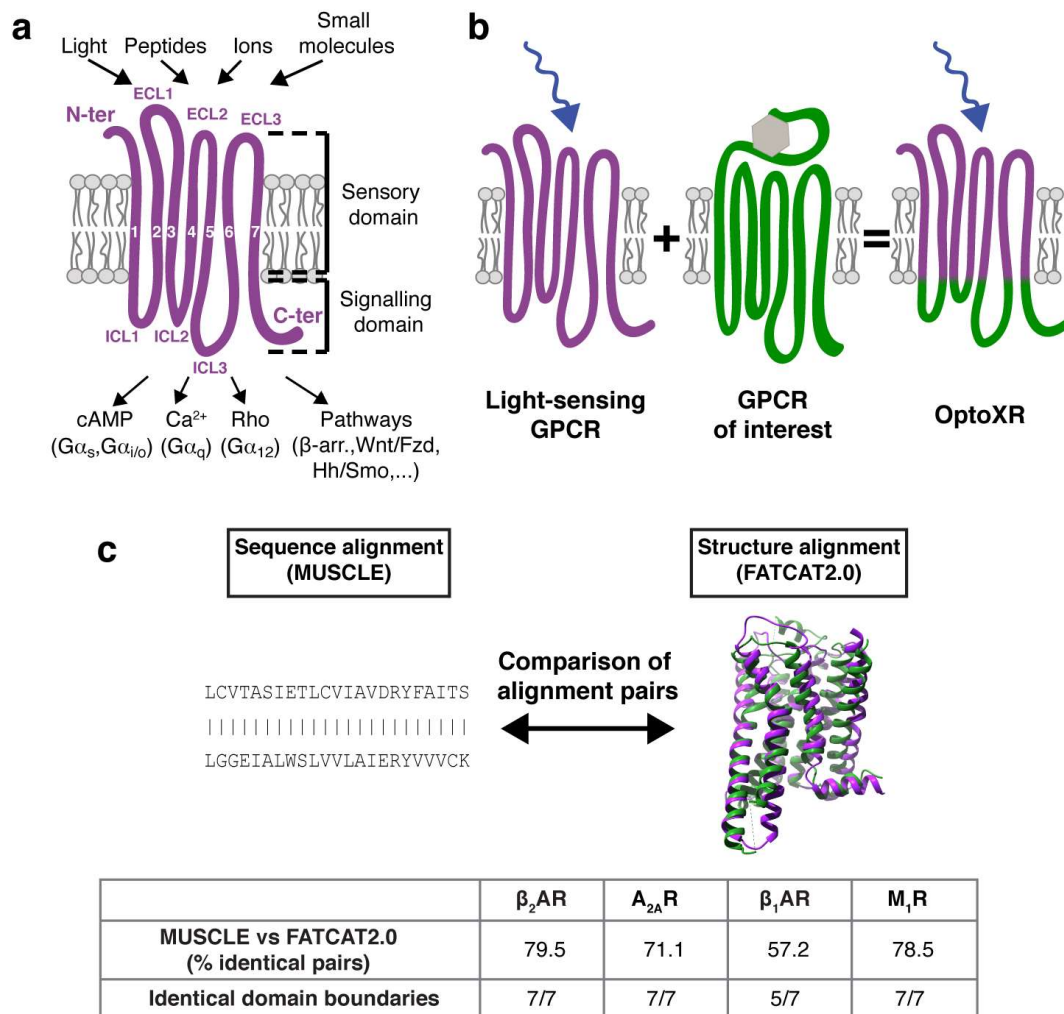

**Fig. 1: Functional principle of OptoXRs and alignment methodologies.** (a) GPCRs sense a variety of external stimuli using their extracellular and TM domains. Downstream signaling is mediated by residues that face the intracellular environment. (b) In chimeric OptoXRs, the signaling elements of a target GPCR of interest is fused to the sensory elements of a light-activated GPCR. (c) Top: Sequence- and structure-based alignments were compared. Bottom: Quantification of alignment similarity expressed either as the percentage of identical residue pairs (top row; see **Supplementary Fig. S1** for a definition of residue pairs) or as the number of identical domain boundaries (bottom row; see **Supplementary Fig. S2** for a definition of domain boundaries).

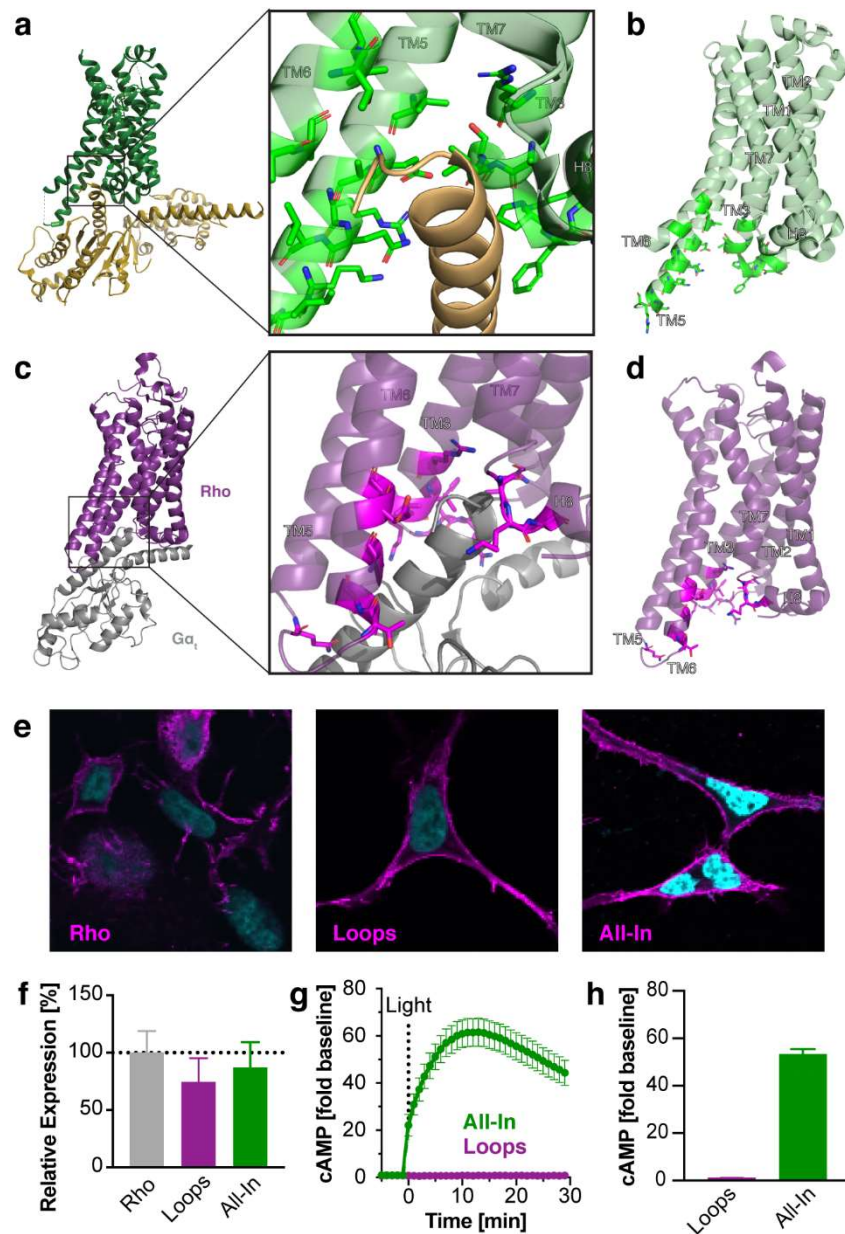

**Fig. 2: Identification of functionally-relevant domain boundaries.** (a-d)  $G\alpha$  contacts on  $\beta_2$ AR (a, b) and rho (c, d) defined as described in the main text (PDB ID: 3SN6 and 6OYA). Contacts extend upwards on TM  $\alpha$ -helices. (e) Confocal microscopy of rho, Opto- $\beta_2$ AR-Loops and -All-In (N-terminal rho epitope 4D2). (f) FC analysis of rho, Opto- $\beta_2$ AR-Loops and -All-In expression using the same antibody as in (e). (g) Time course of cAMP production following light stimulation of OptoXRs ( $\lambda=480 \pm 7.5$  nm,  $I=1.97$  mW/cm<sup>2</sup>, 40 s, 4000 fl). (h) Maximal cAMP signals elicited by OptoXRs (see (f) for light stimulation parameters). For f-h: n=9, 3 independent experiments. Data shown as mean  $\pm$  S.E.M.

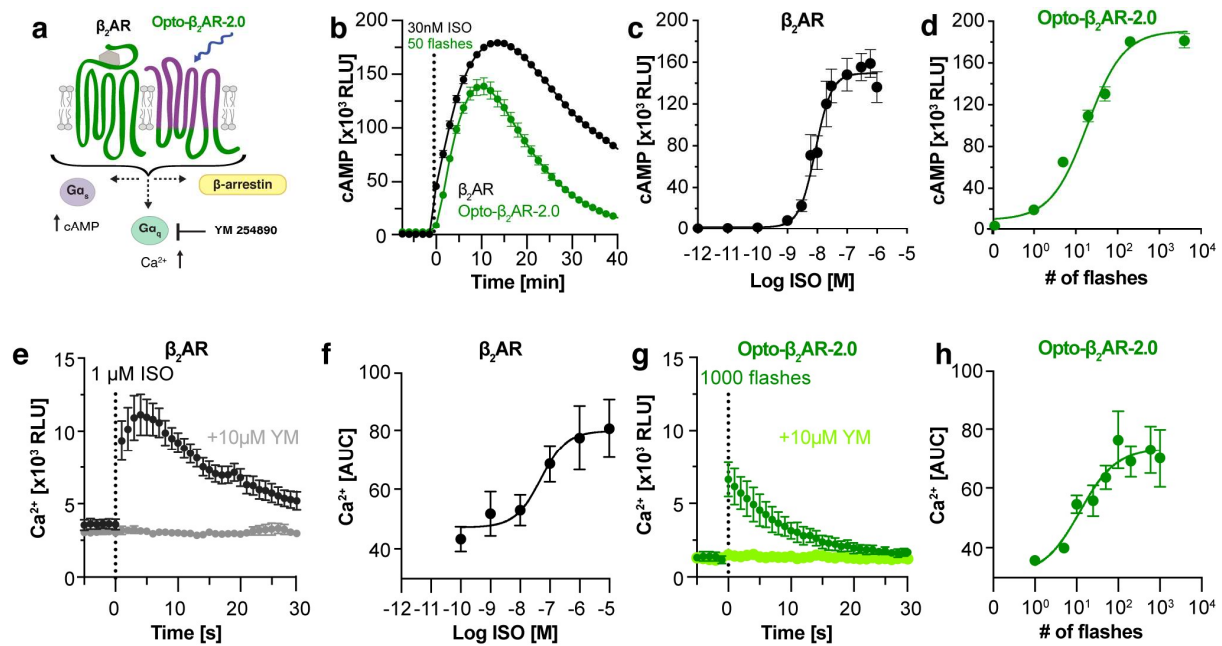

**Fig. 3: Signaling by Opto- $\beta_2$ AR-2.0.** (a) Signaling pathways examined for  $\beta_2$ AR and Opto- $\beta_2$ AR-2.0. (b) Time course of cAMP production following stimulation of  $\beta_2$ AR with ISO (1  $\mu\text{M}$ ) or Opto- $\beta_2$ AR-2.0 with light ( $\lambda=480 \pm 7.5$  nm,  $I=1.97$  mW/cm<sup>2</sup>, 0.5 s, 50 fl). (c, d) Dose-dependent cAMP production following stimulation of  $\beta_2$ AR with ISO or Opto- $\beta_2$ AR-2.0 with light ( $\lambda=480 \pm 7.5$  nm,  $I=1.97$  mW/cm<sup>2</sup>, 0.01-20 s, 1-2000 fl). (e, g) Time course of intracellular  $\text{Ca}^{2+}$  mobilization following stimulation of  $\beta_2$ AR with ISO (as in b) or Opto- $\beta_2$ AR-2.0 with light (as in b). Signaling was abolished by the  $G_{\alpha_q}$  inhibitor YM. (f, h) Dose-dependent  $\text{Ca}^{2+}$  mobilization following stimulation of  $\beta_2$ AR with ISO or Opto- $\beta_2$ AR-2.0 with light ( $\lambda=480 \pm 7.5$  nm,  $I=1.97$  mW/cm<sup>2</sup>, 0.1-10 s, 1-1000 fl). For c, d, f, h: n=9-12, 3-4 independent experiments. Data shown as mean  $\pm$  S.E.M.

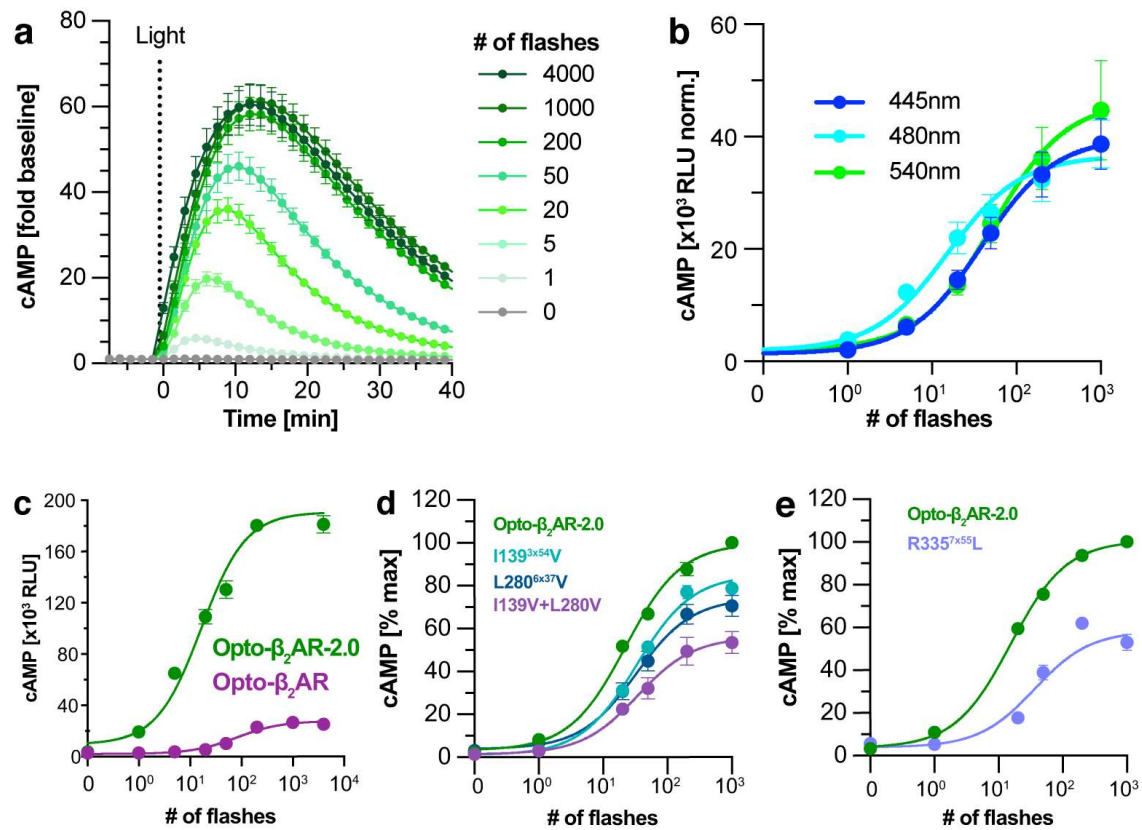

**Fig. 4: Optical activation of Opto-β<sub>2</sub>AR-2.0, Opto-β<sub>2</sub>AR and variant receptors .** (a) Time course of cAMP production following stimulation of Opto-β<sub>2</sub>AR-2.0 ( $\lambda=480 \pm 7.5$  nm,  $I=1.97$  mW/cm<sup>2</sup>, 0.01-40 s, 1-4000 fl). (b) Stimulation of Opto-β<sub>2</sub>AR-2.0 with light of different wavelengths ( $\lambda=480 \pm 7.5$  nm,  $I=1.97$  mW/cm<sup>2</sup>;  $\lambda=445 \pm 7.5$  nm,  $I=1.75$  mW/cm<sup>2</sup>;  $\lambda=540 \pm 7.5$  nm,  $I=1.35$  mW/cm<sup>2</sup>; for all wavelengths: 0.01-10 s, 1-1000 fl). (c) Stimulation of Opto-β<sub>2</sub>AR and Opto-β<sub>2</sub>AR-2.0 with increasing light doses ( $\lambda=480 \pm 7.5$  nm,  $I=1.97$  mW/cm<sup>2</sup>, 0.01-40 s, 1-4000 fl). (d, e) Stimulation of Opto-β<sub>2</sub>AR-2.0 reversal variants I139<sup>3x54V</sup>, L270<sup>6x37V</sup> and the corresponding double mutant (d) as well as R335<sup>7x55L</sup> (e) with light ( $\lambda=480 \pm 7.5$  nm,  $I=1.97$  mW/cm<sup>2</sup>, 0.01-10 s, 1-1000 fl). For b-e: n=6-9, 2-3 independent experiments. Data shown as mean  $\pm$  S.E.M.



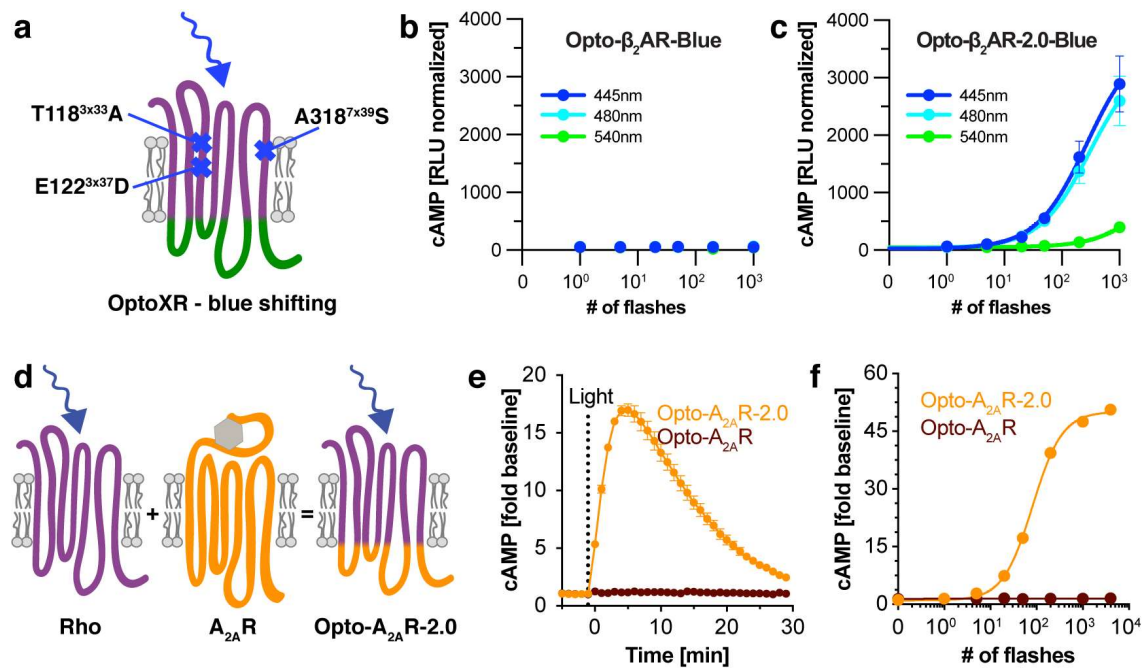

**Fig. 5: Diversified receptor variants.** (a) Substitutions in Opto-β<sub>2</sub>AR and Opto-β<sub>2</sub>AR-2.0 to engineer variants termed Opto-β<sub>2</sub>AR-Blue and Opto-β<sub>2</sub>AR-2.0-Blue. (b,c) Stimulation of Opto-β<sub>2</sub>AR-Blue and Opto-β<sub>2</sub>AR-2.0-Blue with light of different wavelengths ( $\lambda=480 \pm 7.5$  nm,  $I=1.97$  mW/cm<sup>2</sup>;  $\lambda=445 \pm 7.5$  nm,  $I=1.75$  mW/cm<sup>2</sup>;  $\lambda=540 \pm 7.5$  nm,  $I=1.35$  mW/cm<sup>2</sup>; for all wavelengths: 0.01-10 s, 1-1000 fl). (d) Opto-A<sub>2A</sub>R-2.0. (e) Time course of cAMP production following stimulation of Opto-A<sub>2A</sub>R and Opto-A<sub>2A</sub>R-2.0 with light ( $\lambda=480 \pm 7.5$  nm,  $I=1.97$  mW/cm<sup>2</sup>, 0.5 s, 50 fl). (f) Dose-dependent cAMP production following stimulation Opto-A<sub>2A</sub>R-2.0 and Opto-A<sub>2A</sub>R with light ( $\lambda=480 \pm 7.5$  nm,  $I=1.97$  mW/cm<sup>2</sup>, 0.1-20 s, 1-2000 fl). For panels b, c, f: n=6-9, 2-3 independent experiments. Data shown as mean  $\pm$  S.E.M.
